# Supplementary material
Source: PubMed Central journal article supplement (PMC6035085)
Supplement: NIHMS971059-supplement-S1.pdf [file NIHMS971059-supplement-S1.pdf]

## Supplementary Materials for

### **Paneth cells acquire multi-potency upon Notch activation after irradiation**

Shiyan Yu <sup>1</sup>, Kevin Tong <sup>2</sup>, Yanlin Zhao <sup>3</sup>, Iyshwarya Balasubramanian <sup>1</sup>, George S. Yap <sup>3</sup>, Ronaldo P. Ferraris <sup>4</sup>, Edward M. Bonder <sup>1</sup>, Michael P. Verzi <sup>2, 5</sup>, Nan Gao <sup>1, 5, \*</sup>

This PDF file includes:

**Figure S1. Related to Fig. 1:** Detection of tdTomato reporter expression.

**Figure S2. Related to Fig. 1:** Determine tdT<sup>+</sup> cells after different tracing periods.

**Figure S3. Related to Fig. 4:** GSEA shows tdT<sup>+</sup>CD24<sup>-</sup> cells from irradiated mice lost Paneth cell gene expression.

**Figure S4. Related to Fig. 4:** Single tdT<sup>+</sup> cells from irradiated mice formed organoids in vitro.

**Figure S5. Related to Fig. 4:** Single tdT<sup>+</sup> cells from non-irradiated mice did not form organoids.

**Figure S6. Related to Fig. 6:** Irradiation rapidly reduced Olfm4-, Notch1-, and Hes1-expressing crypt cells.

**Table S1. Related to STAR Methods:** Detailed information about antibodies for immunofluorescence.

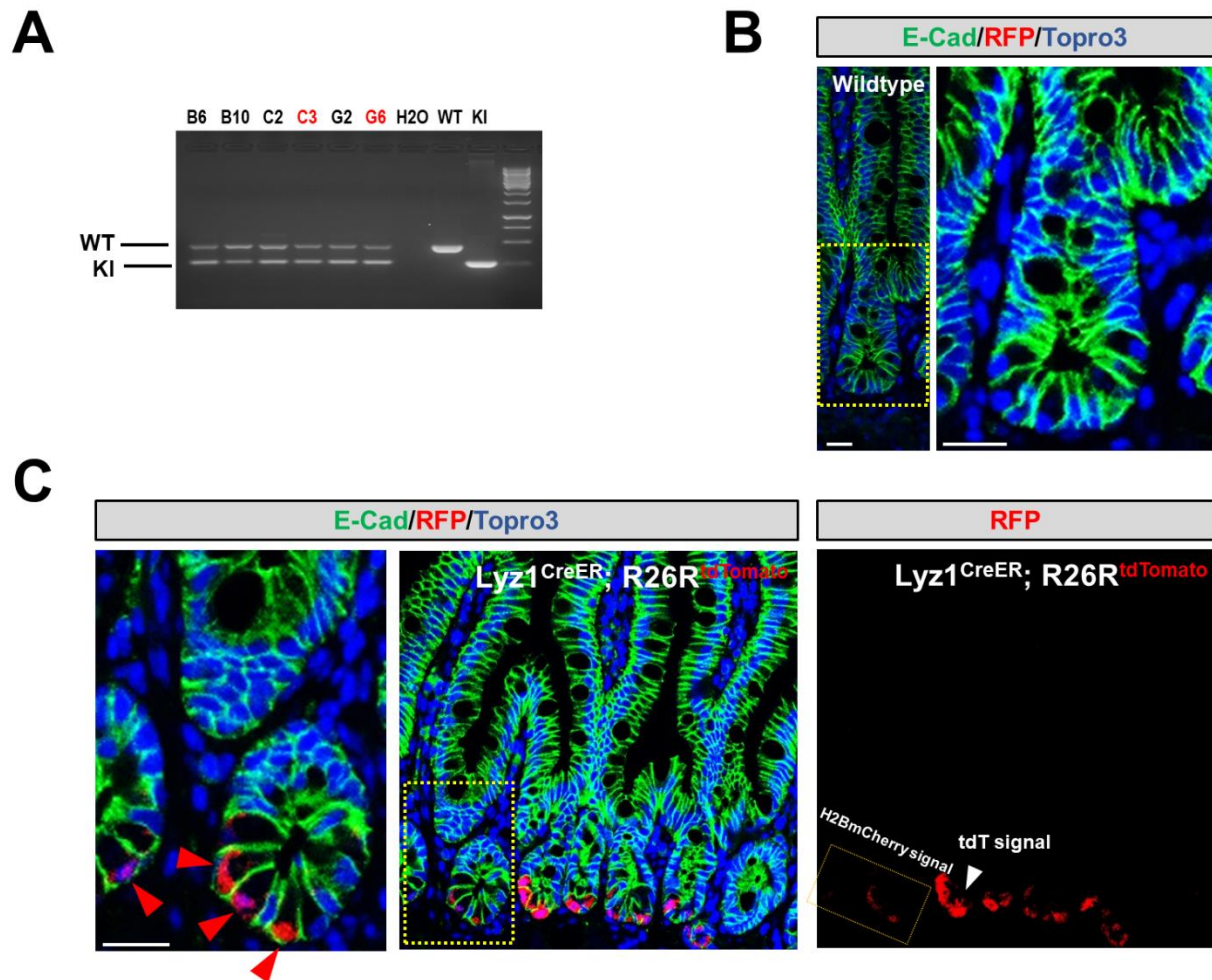

**Figure S1. Related to Fig. 1: Nuclear H<sub>2</sub>B-mCherry and tdTomato expression**

(A) Two positive ES cell clones (C3 and G6) were injected to blastocysts, leading to two independent Lyz1-CreER lines with almost identical labeling patterns.

(B) Anti-RFP antibody did not detect any signals in wild type crypts.

(C) Same antibody detected relatively weak nuclear H<sub>2</sub>BmCherry signal (red arrowheads, left panel). Recombined cells showed intense tdTomato signal (white arrowhead, right panel).

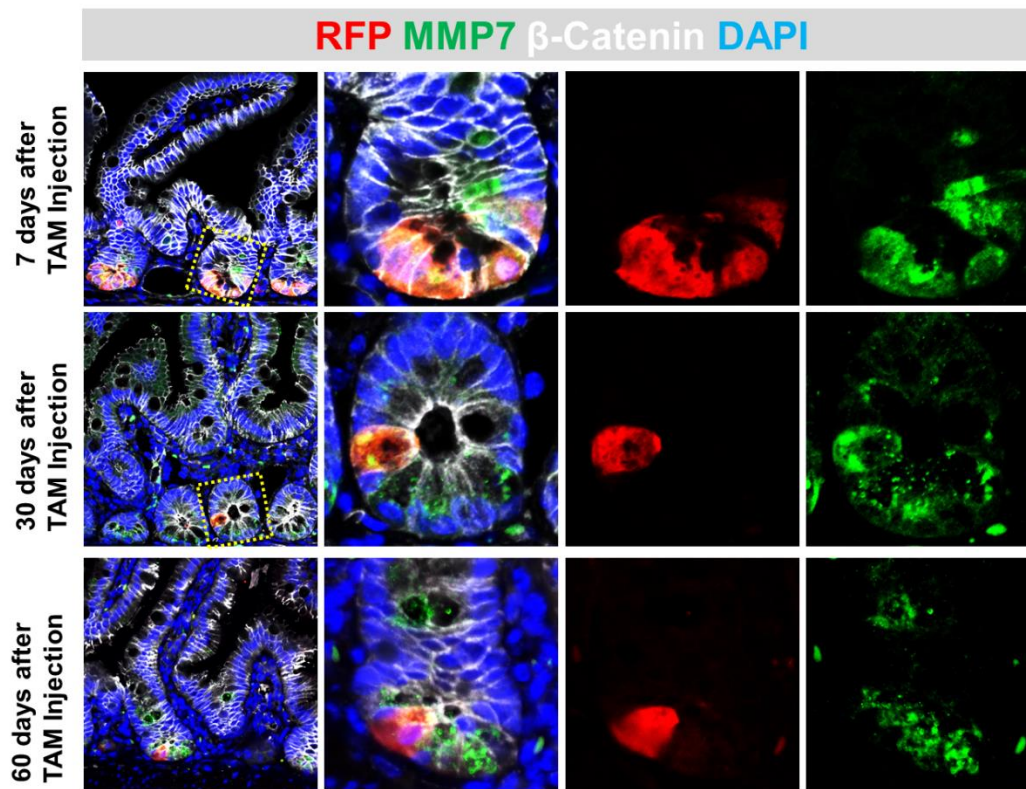

**Figure S2. Related to Fig. 1: Determine tdT<sup>+</sup> cells after different tracing periods.**

Mice were sacrificed 7, 30, and 60 days after tamoxifen injection to examine recombined tdT<sup>+</sup> cells in the intestines. Sections were stained for tdT, MMP7, and beta-catenin.

**GSEA (Irradiated tdT<sup>+</sup>CD24<sup>-</sup> vs. Irradiated tdT<sup>+</sup>CD24<sup>+</sup> cells)**

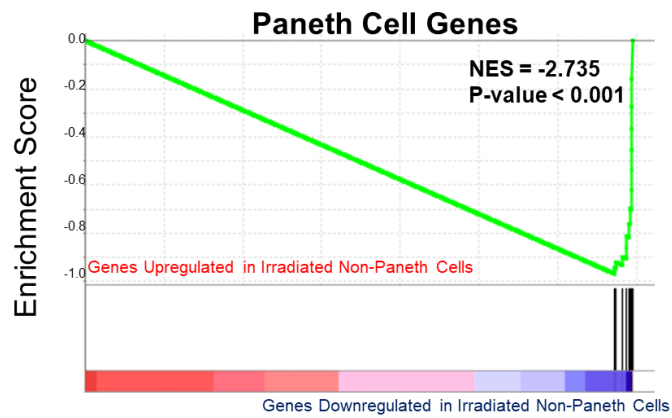

**Figure S3. Related to Fig. 4: GSEA showed that tdT<sup>+</sup>CD24<sup>-</sup> cells lost their Paneth cell gene expression when compared to tdT<sup>+</sup>CD24<sup>+</sup> cells in irradiated mice.**

GSEA confirms that tdT<sup>+</sup>CD24<sup>-</sup> cells lack Paneth cell gene expression compared to tdT<sup>+</sup>CD24<sup>+</sup> cells.

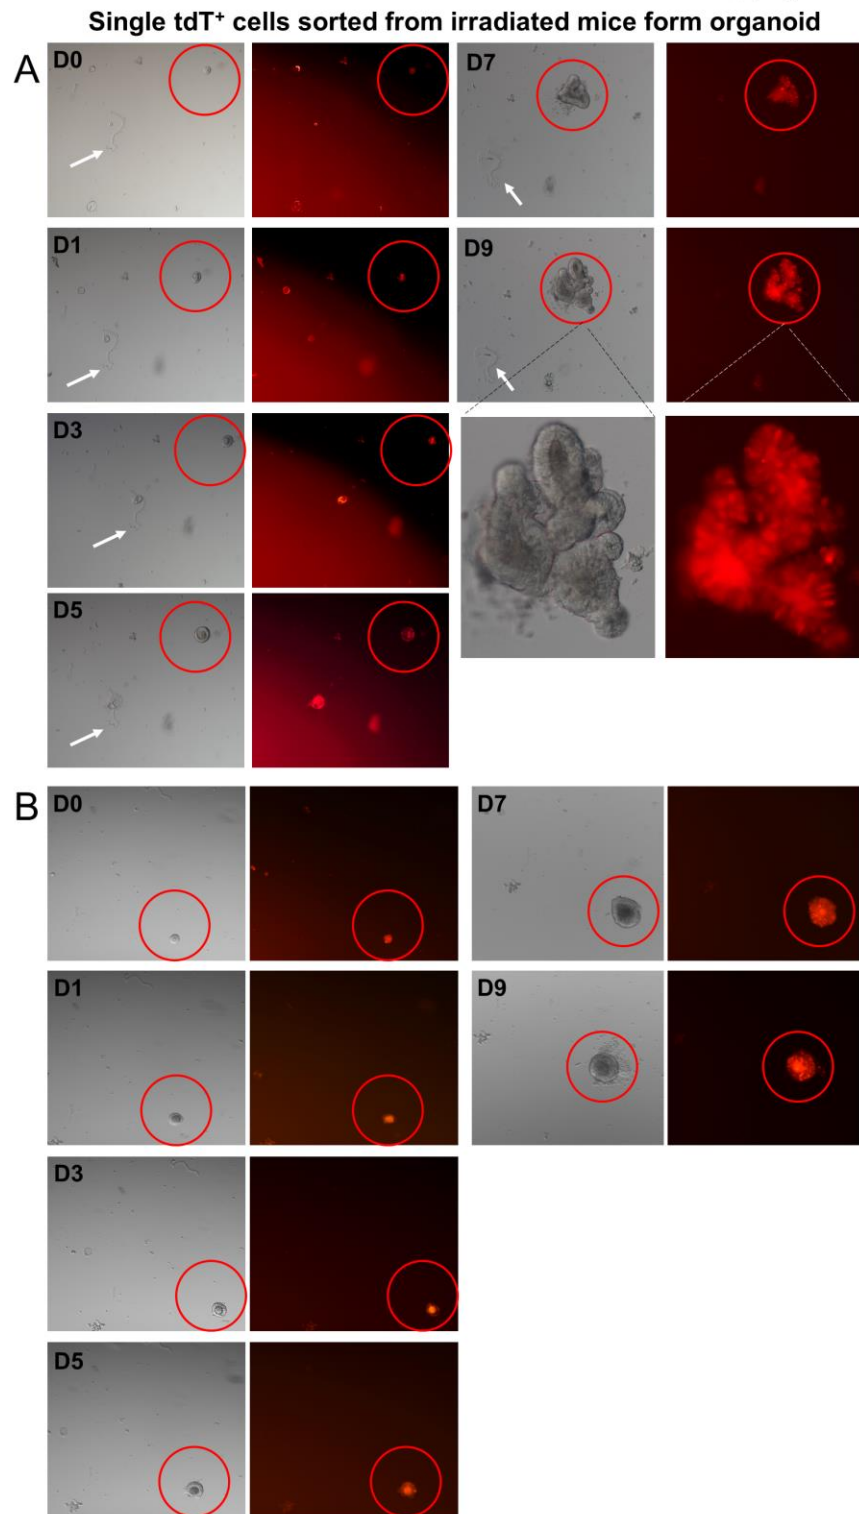

**Figure S4. Related to Fig. 4: Single tdT<sup>+</sup> cells from irradiated mice formed organoids in vitro.**

Two different examples were shown: one formed branches (A) and the other did not (B).

White arrows pointed to some marks that were used to track the field. D: day

**Single tdT<sup>+</sup> cells sorted from non-irradiated mice did not form organoid**

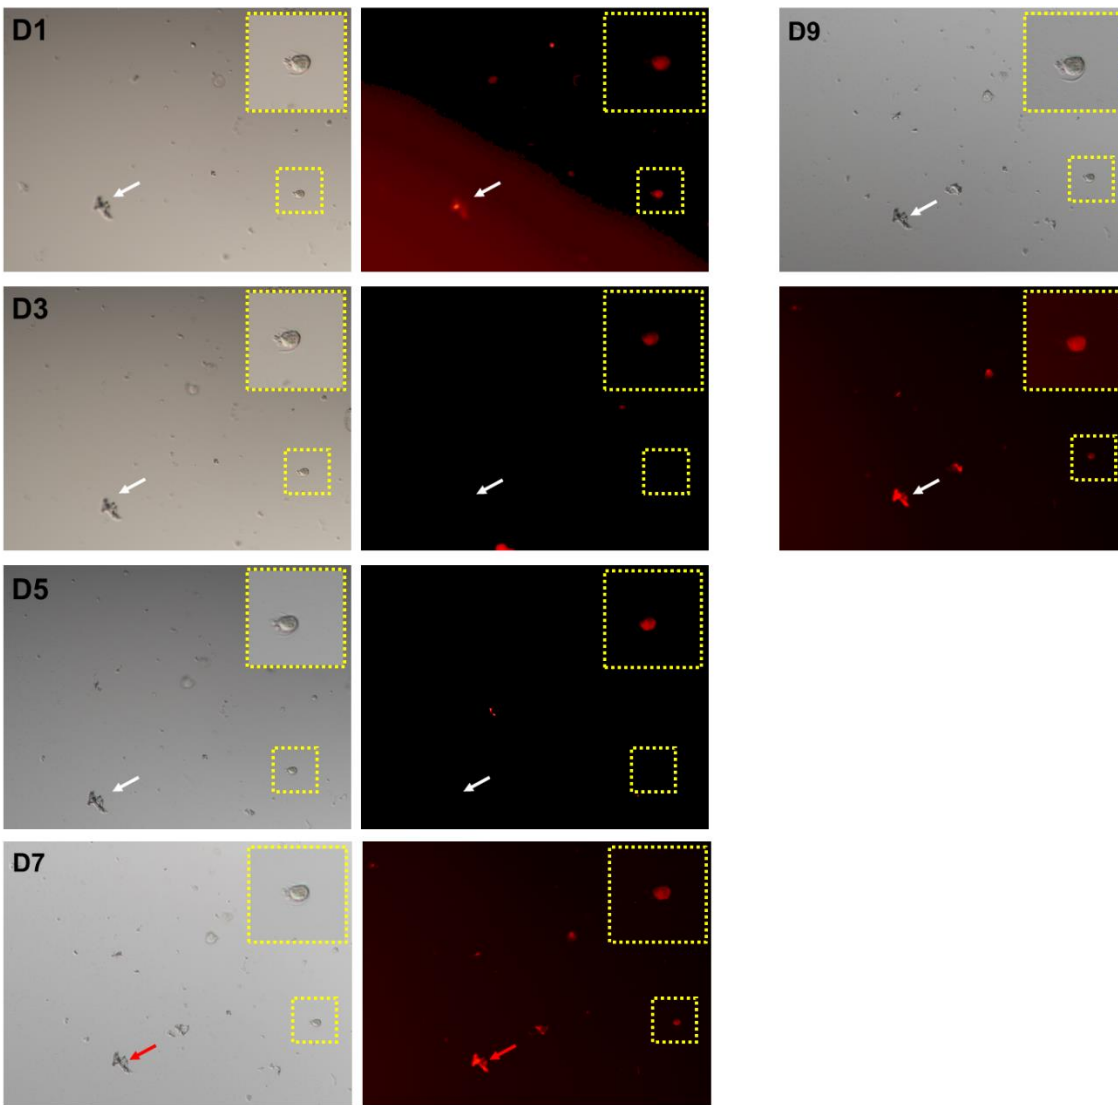

**Figure S5. Related to Fig. 4 Single tdT<sup>+</sup> cells from non-irradiated mice did not form organoids.**

A single tdT<sup>+</sup> cell was followed from Day 1 to Day 9.

White arrows pointed to the landmark that was used to track the field. D: day

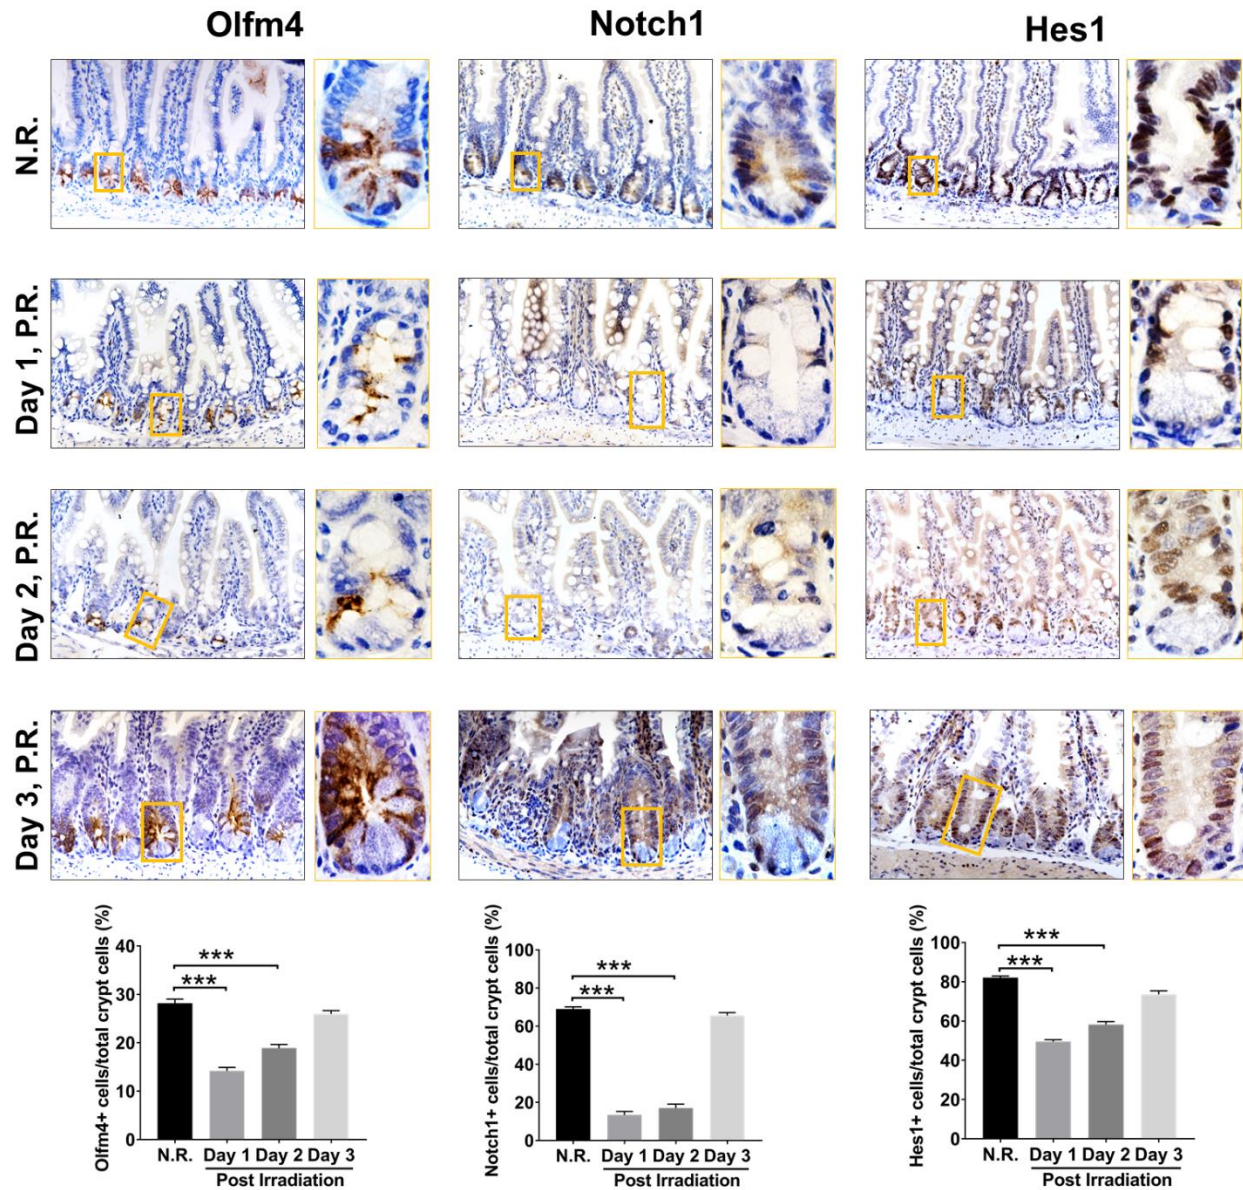

**Figure S6. Related to Fig. 6: Irradiation rapidly reduced Olfm4-, Notch1-, and Hes1-expressing crypt cells.**

In non-irradiated (N.R.) mice, Olfm4, Notch1, Hes1 expressing cells were detected at the bottom of crypts where CBCs localize. 1-2 days after irradiation, cells expressing these markers were significantly decreased. 3 days after irradiation, cells expressing these markers recovered to some extent. \*\*\*,  $p < 0.001$ .

**Table S1. Detailed information about antibodies for immunofluorescence**

| <b>Antibody Name</b>         | <b>Source</b>           | <b>Antigen Retrieval</b>                                                           | <b>Dilution</b> |
|------------------------------|-------------------------|------------------------------------------------------------------------------------|-----------------|
| Goat anti-GFP                | Abcam (ab6673)          | No antigen retrieval on frozen sections                                            | 1:100           |
| Rabbit anti-RFP              | Rockland (600-401-379)  | Citric acid pH6.0 on paraffin sections                                             | 1:200           |
| Mouse anti-RFP               | Invitrogen (MA5-15257)  | Citric acid pH6.0 on paraffin sections                                             | 1:200           |
| Rabbit anti-Hes1             | Cell signaling (11988)  | Citric acid pH6.0 on paraffin sections                                             | 1:1,000         |
| Rabbit anti-NICD1            | Cell Signaling (4147)   | DAKO Target Retrieval Solution (S1699) on paraffin sections                        | 1:100           |
| Rabbit anti-Olfm4            | Cell Signaling (39141)  | No antigen retrieval on frozen sections;<br>Citric acid pH6.0 on paraffin sections | 1:1,000         |
| Rabbit anti-YAP              | Cell Signaling (14074)  | Citric acid pH6.0 on paraffin sections                                             | 1:100           |
| Rabbit anti-Ki67             | Abcam (ab16667)         | Citric acid pH6.0 on paraffin sections                                             | 1:200           |
| Rat anti-Ki67                | Invitrogen (14-5698-82) | Citric acid pH6.0 on paraffin sections                                             | 1:250           |
| Mouse anti-PCNA              | Santa Cruz (sc-56)      | Citric acid pH6.0 on paraffin sections                                             | 1:200           |
| Rabbit anti-Lysozyme         | BioGenex (AR024-10R)    | No antigen retrieval on frozen sections;<br>Citric acid pH6.0 on paraffin sections | Read-to-use     |
| Goat anti-Sucrase-isomaltase | Santa Cruz (sc-27603)   | No antigen retrieval on frozen sections;<br>Citric acid pH6.0 on paraffin sections | 1:200           |
| Rabbit anti-Dclk1            | Abcam (ab37994)         | No antigen retrieval on frozen sections;                                           | 1:200           |



|                                  |                              |                                                                                    |         |
|----------------------------------|------------------------------|------------------------------------------------------------------------------------|---------|
|                                  |                              | Citric acid pH6.0 on paraffin sections                                             |         |
| Rabbit anti-Chromogranin A       | ImmunoStar (20085)           | No antigen retrieval on frozen sections;<br>Citric acid pH6.0 on paraffin sections | 1:2,000 |
| Rabbit anti-Mucin 2              | Santa Cruz (sc-15334)        | No antigen retrieval on frozen sections;<br>Citric acid pH6.0 on paraffin sections | 1:200   |
| Goat anti-MMP7                   | Santa Cruz (sc-8832)         | Citric acid pH6.0 on paraffin sections                                             | 1:100   |
| Rat anti-BrdU                    | Accurate Chemical (OBT0030G) | Citric acid pH6.0 on paraffin sections                                             | 1:200   |
| Rabbit anti-phospho-p53 (S18)    | R&D systems (AF1043-SP)      | Citric acid pH6.0 on paraffin sections                                             | 1:200   |
| Rabbit anti-phospho-Stat3 (Y705) | Cell Signaling (9145)        | EDTA pH8.0 on paraffin sections                                                    | 1:100   |
